# Supplementary material
Source: Springer Nature journal article supplement (https://www.springermedizin.de/resource/supplementary/12936_2009_1243_MOESM2_ESM.pdf/9549312)

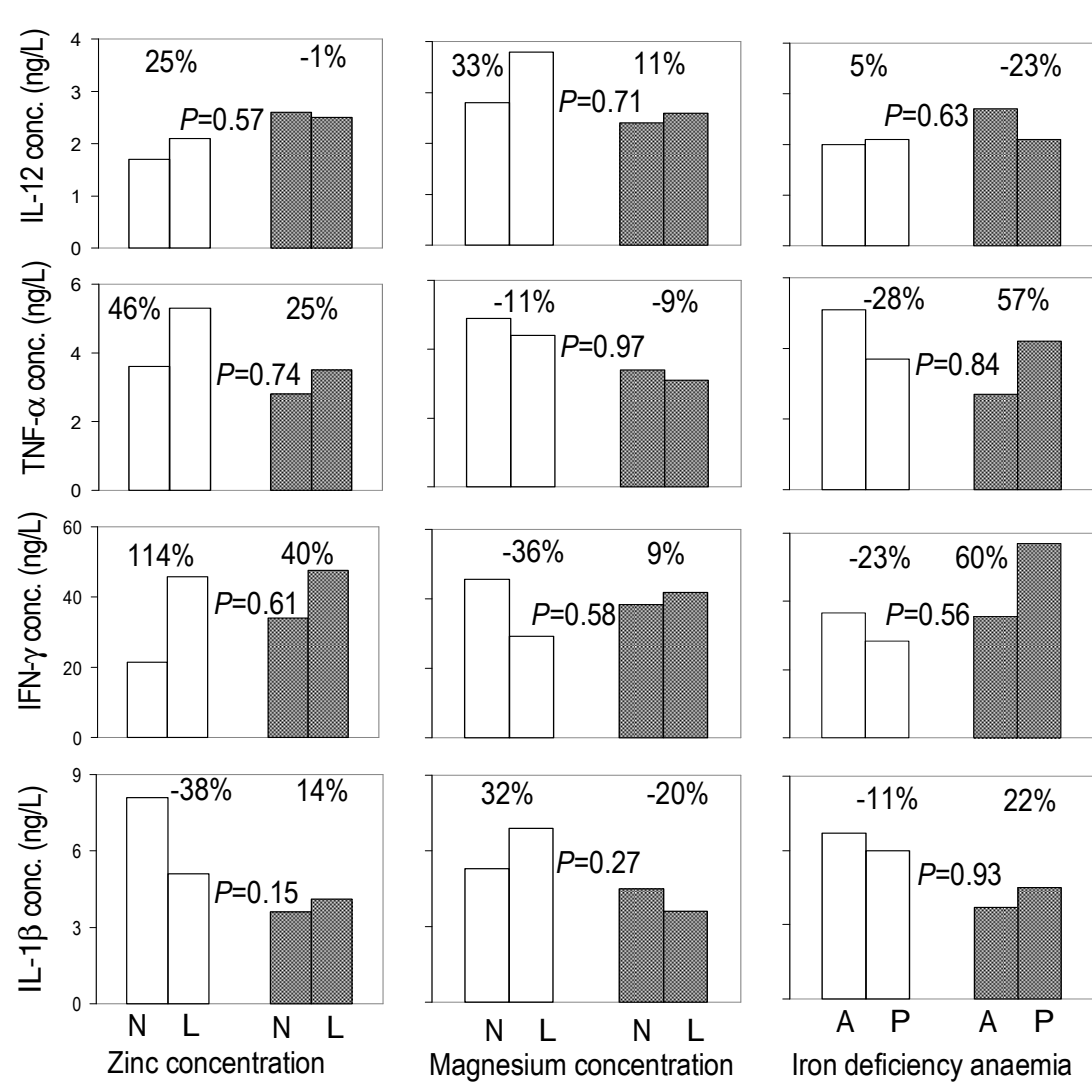

Supplement: MOESM2 [file 9549312]
